# Supplementary material for: Complete Genome Sequence and Comparative Analysis of the Fish Pathogen Lactococcus garvieae
Source: PLoS One. 2011 Aug 4;6(8):e23184. doi: 10.1371/journal.pone.0023184 (PMC3150408; doi:10.1371/journal.pone.0023184)
Supplement: Table S1 — General genomic features of L. garvieae and five other lactococci. (XLSX) [file pone.0023184.s004.xlsx]

## Sheet: Table S1
Table S1. General genomic features of L. garvieae and five other lactococci
	L. garvieae			L. lactis subsp.
Strain	ATCC 49156	Lg2		lactis IL1403	lactis KF147	cremoris MG1363	cremoris SK11	cremoris NZ9000
Chromosome size (bp)	1950135	1963964		2365589	2598144	2529478	2438589	2530294
Protein-coding genes	1947	1968		2321	2444	2434	2384	2510
tRNA genes	62	62		61	68	61	61	63
rRNA operons	5	5		6	6	6	6	6
Plasmids	None	None		None	1	None	5	None
