# Supplementary material for: Complete Genome Sequence and Comparative Analysis of the Fish Pathogen Lactococcus garvieae
Source: PLoS One. 2011 Aug 4;6(8):e23184. doi: 10.1371/journal.pone.0023184 (PMC3150408; doi:10.1371/journal.pone.0023184)
Supplement: Table S3 — The 366 genes conserved in the five sequenced L. lactis but absent in L. garvieae Lg2. (XLSX) [file pone.0023184.s006.xlsx]

## Sheet: Table S3
Table S3. The 366 genes conserved in the five sequenced L. lactis but absent in L. garvieae Lg2
L. lactis subsp. lactis IL1403	L. lactis subsp. lactis KF147	L. lactis subsp. cremoris MG1363	L. lactis subsp. cremoris SK11	L. lactis subsp. cremoris NZ9000	Predicted gene product
L10283	LLKF_0006	llmg_0006	LACR_0006	LLNZ_00030	putative HTH-type transcriptional regulator
L36850	LLKF_2464	llmg_0029	LACR_2257	LLNZ_00140	hypothetical protein
L37667	LLKF_2463	llmg_0030	LACR_2258	LLNZ_00145	putative DNA primase
L39306	LLKF_2462	llmg_2253	LACR_2259	LLNZ_11625	phage protein by Glimmer/Critica
L40862	LLKF_2458	llmg_0034	LACR_2262	LLNZ_00165	hypothetical protein
L41144	LLKF_2457	llmg_0035	LACR_2263	LLNZ_00170	putative DNA binding protein
L41670	LLKF_2456	llmg_2260	LACR_2265	LLNZ_11660	phage protein by Glimmer/Critica
L44085	LLKF_1033	llmg_0042	LACR_2270	LLNZ_00205	hypothetical protein
L45035	LLKF_2448	llmg_0044	LACR_2271	LLNZ_00215	hypothetical protein
L200004	LLKF_2446	llmg_0053	LACR_2598	LLNZ_00265	hypothetical protein
L50682	LLKF_0029	llmg_0062	LACR_0041	LLNZ_00310	hypothetical protein
L56488	LLKF_0032	llmg_0066	LACR_0046	LLNZ_00330	aromatic amino acid aminotransferase
L69353	LLKF_0044	llmg_0081	LACR_0060	LLNZ_00400	putative amino-acid permease
L75975	LLKF_0052	llmg_0091	LACR_0068	LLNZ_00455	O-acetylhomoserine sulfhydrylase
L1010	LLKF_0054	llmg_0093	LACR_0071	LLNZ_00465	hypothetical protein
L103661	LLKF_0069	llmg_0109	LACR_0088	LLNZ_00545	hypothetical protein
L106031	LLKF_0072	llmg_0112	LACR_0091	LLNZ_00560	putative xylanase/chitin deacetylase
L111003	LLKF_0076	llmg_0116	LACR_0095	LLNZ_00580	hypothetical protein
L115025	LLKF_0080	llmg_0120	LACR_0099	LLNZ_00605	MarR family transcriptional regulator
L126739	LLKF_0108	llmg_0138	LACR_0125	LLNZ_00730	argininosuccinate synthase
L0114	LLKF_0109	llmg_0139	LACR_0126	LLNZ_00735	argininosuccinate lyase
L129379	LLKF_0110	llmg_0140	LACR_0127	LLNZ_00740	major facilitator superfamily permease
L130713	LLKF_0111	llmg_0141	LACR_0128	LLNZ_00745	putative transcriptional regulator
L142704	LLKF_0120	llmg_0153	LACR_0140	LLNZ_00805	hypothetical protein
L143350	LLKF_0121	llmg_0154	LACR_0141	LLNZ_00810	carbonyl reductase
L144155	LLKF_0122	llmg_0155	LACR_0142	LLNZ_00815	hypothetical protein
L144410	LLKF_0123	llmg_0156	LACR_0143	LLNZ_00820	oxidoreductase dltE
L145301	LLKF_0124	llmg_0157	LACR_0144	LLNZ_00825	transcriptional regulator
L148007	LLKF_0126	llmg_0159	LACR_0146	LLNZ_00835	hypothetical protein
L158834	LLKF_0148	llmg_0167	LACR_0162	LLNZ_00880	hypothetical protein
L159400	LLKF_0149	llmg_0168	LACR_0163	LLNZ_00885	deoxyribonuclease
L160556	LLKF_0151	llmg_0169	LACR_0165	LLNZ_00895	hypothetical protein
L162604	LLKF_0153	llmg_0171	LACR_0167	LLNZ_00905	aminotransferase AlaT
L16653	LLKF_0209	llmg_2350	LACR_2370	LLNZ_12120	glycosyl transferase family protein
L24277	LLKF_0216	llmg_0232	LACR_0227	LLNZ_01200	hypothetical protein
L27646	LLKF_0221	llmg_0238	LACR_0233	LLNZ_01230	hypothetical protein
L34460	LLKF_0230	llmg_0248	LACR_0243	LLNZ_01285	TetR family transcriptional regulator
L36748	LLKF_0233	llmg_0250	LACR_0245	LLNZ_01295	MerR family transcriptional regulator
L41779	LLKF_0241	llmg_0252	LACR_0247	LLNZ_01305	hypothetical protein
L44063	LLKF_0243	llmg_0255	LACR_0250	LLNZ_01320	DhaKLM operon coactivator DhaQ
L47257	LLKF_0247	llmg_0258	LACR_0254	LLNZ_01345	hypothetical protein
L57608	LLKF_0255	llmg_0266	LACR_0263	LLNZ_01395	putative sugar kinase
L59135	LLKF_0259	llmg_0268	LACR_0265	LLNZ_01405	ABC transporter ATP binding protein
L61680	LLKF_0260	llmg_0269	LACR_0266	LLNZ_01410	ABC transporter ATP-binding and permease protein
L78434	LLKF_0329	llmg_0290	LACR_0291	LLNZ_01525	hypothetical protein
L79267	LLKF_0330	llmg_0291	LACR_0293	LLNZ_01530	2,3,4,5-tetrahydropyridine-2,6-dicarboxylate N-acetyltransferase
L80177	LLKF_0331	llmg_0292	LACR_0294	LLNZ_01535	putative hippurate hydrolase
L94552	LLKF_0345	llmg_0310	LACR_0331	LLNZ_01620	hypothetical protein
L97415	LLKF_0349	llmg_0313	LACR_0335	LLNZ_01635	phosphonates import ATP-binding protein phnC
L98204	LLKF_0350	llmg_0314	LACR_0336	LLNZ_01640	ABC-type phosphate/phosphonate transport system, permease component
L99004	LLKF_0351	llmg_0315	LACR_0337	LLNZ_01645	phosphonate ABC transporter, permease protein PhnE
L99798	LLKF_0352	llmg_0316	LACR_0338	LLNZ_01650	2',3'-cyclic-nucleotide 2'-phosphodiesterase
L101699	LLKF_0353	llmg_0318	LACR_0340	LLNZ_01660	thiol peroxidase
L108503	LLKF_0358	llmg_0323	LACR_0345	LLNZ_01700	PadR-like family transcriptional regulator
L117444	LLKF_0372	llmg_0335	LACR_0360	LLNZ_01760	D-methionine-binding lipoprotein plpA precursor
L119452	LLKF_0374	llmg_0338	LACR_0362	LLNZ_01770	D-methionine-binding lipoprotein plpC precursor
L120334	LLKF_0375	llmg_0340	LACR_0364	LLNZ_01780	D-methionine-binding lipoprotein plpD precursor
L123147	LLKF_0378	llmg_0343	LACR_0367	LLNZ_01795	hypothetical protein
L123777	LLKF_0379	llmg_0344	LACR_0368	LLNZ_01800	putative cobalt ABC transporter ATP-binding protein
L125503	LLKF_0380	llmg_0345	LACR_0369	LLNZ_01805	putative cobalt ABC transporter permease protein
L131423	LLKF_0387	llmg_0351	LACR_0377	LLNZ_01840	putative arabinose efflux permease
L132617	LLKF_0388	llmg_0352	LACR_0378	LLNZ_01845	aldo/keto reductase family oxidoreductase
L133547	LLKF_0389	llmg_0353	LACR_0379	LLNZ_01850	putative transcription regulator
L133932	LLKF_0390	llmg_0354	LACR_0380	LLNZ_01855	putative glyoxylase
L00396	LLKF_0407	llmg_0372	LACR_0398	LLNZ_01945	asparagine synthetase B
L161441	LLKF_0411	llmg_0376	LACR_0402	LLNZ_01965	amino acid permease
L165247	LLKF_0416	llmg_0381	LACR_0407	LLNZ_01990	hypothetical protein
L195067	LLKF_0440	llmg_0405	LACR_0434	LLNZ_02110	hypothetical protein
L13150	LLKF_0461	llmg_0430	LACR_0459	LLNZ_02240	carbon starvation protein A
L19721	LLKF_0467	llmg_0439	LACR_0467	LLNZ_02280	LacI family transcription regulator
L39593	LLKF_0481	llmg_0455	LACR_0483	LLNZ_02355	putative trehalose/maltose hydrolase
L42784	LLKF_0483	llmg_0457	LACR_0485	LLNZ_02365	lipase/esterase (putative)
L43651	LLKF_0484	llmg_0458	LACR_0486	LLNZ_02370	hypothetical protein
L51420	LLKF_1531	llmg_2134	LACR_2135	LLNZ_11005	putative phage antirepressor protein
L0202	LLKF_0489	llmg_0463	LACR_0492	LLNZ_02395	phosphomethylpyrimidine kinase
L86881	LLKF_0492	llmg_0466	LACR_0496	LLNZ_02410	putative aminotransferase
L90946	LLKF_0495	llmg_0476	LACR_0511	LLNZ_02465	hypothetical protein
L100350	LLKF_0504	llmg_0494	LACR_0523	LLNZ_02555	putative beta-N-acetylglucosaminidase
L107665	LLKF_2459	llmg_2531	LACR_2261	LLNZ_13070	hypothetical protein
L119676	LLKF_0511	llmg_0501	LACR_0530	LLNZ_02590	ABC transporter ATP binding protein
L120437	LLKF_0512	llmg_0502	LACR_0531	LLNZ_02595	ABC transporter permease protein
L121252	LLKF_0513	llmg_0503	LACR_0532	LLNZ_02600	LytR family transcriptional regulator
L121731	LLKF_0514	llmg_0504	LACR_0533	LLNZ_02605	hypothetical protein
L123471	LLKF_0516	llmg_0506	LACR_0535	LLNZ_02615	hypothetical protein
L124415	LLKF_0517	llmg_0507	LACR_0536	LLNZ_02620	peptide binding protein
L148346	LLKF_0533	llmg_0523	LACR_0573	LLNZ_02705	glycerol-3-phosphatase transporter
L150017	LLKF_0534	llmg_0527	LACR_0577	LLNZ_02725	hypothetical protein
L153086	LLKF_0536	llmg_0529	LACR_0579	LLNZ_02735	putative transcriptional regulator
L0004	LLKF_0537	llmg_0530	LACR_0580	LLNZ_02740	glyceraldehyde 3-phosphate dehydrogenase
L158343	LLKF_0541	llmg_0535	LACR_0584	LLNZ_02760	arginine-binding periplasmic protein 1 precursor
L165449	LLKF_0549	llmg_0541	LACR_0589	LLNZ_02785	alpha-phosphoglucomutase
L185472	LLKF_0572	llmg_0556	LACR_0609	LLNZ_02855	hypothetical protein
L187716	LLKF_0575	llmg_0559	LACR_0613	LLNZ_02870	NADPH-flavin oxidoreductase
L0083	LLKF_0581	llmg_0565	LACR_0619	LLNZ_02900	phosphoserine aminotransferase
L0084	LLKF_0582	llmg_0566	LACR_0620	LLNZ_02905	D-3-phosphoglycerate dehydrogenase
L0085	LLKF_0583	llmg_0567	LACR_0621	LLNZ_02910	SerB protein
L200264	LLKF_0589	llmg_0576	LACR_0630	LLNZ_02960	TetR family transcriptional regulator
L71075	LLKF_0648	llmg_0637	LACR_0699	LLNZ_03290	isocitrate dehydrogenase
L88237	LLKF_0707	llmg_1884	LACR_0716	LLNZ_09705	DNA topology modulation protein FlaR, putative
L104437	LLKF_0720	llmg_1865	LACR_0734	LLNZ_09605	di-/tripeptide transporter
L115265	LLKF_0726	llmg_1859	LACR_0743	LLNZ_09570	putative flavodoxin
L115789	LLKF_0727	llmg_1857	LACR_0744	LLNZ_09560	putative esterase
L119032	LLKF_0730	llmg_1854	LACR_0747	LLNZ_09540	alkaline phosphatase
L121994	LLKF_0732	llmg_1852	LACR_0749	LLNZ_09530	hypothetical protein
L124252	LLKF_0735	llmg_1849	LACR_0752	LLNZ_09515	hypothetical protein
L145739	LLKF_0759	llmg_1821	LACR_0782	LLNZ_09375	hypothetical protein
L0097	LLKF_0760	llmg_1820	LACR_0783	LLNZ_09370	aspartate kinase
L148897	LLKF_0761	llmg_1819	LACR_0785	LLNZ_09365	hypothetical protein
L0248	LLKF_0762	llmg_1818	LACR_0786	LLNZ_09360	MarR family transcriptional regulator
L162840	LLKF_0776	llmg_1804	LACR_0800	LLNZ_09290	Rgg family transcriptional regulator
L164132	LLKF_0777	llmg_1803	LACR_0804	LLNZ_09285	hypothetical protein
L167770	LLKF_0778	llmg_1802	LACR_0805	LLNZ_09280	hypothetical protein
L169709	LLKF_0779	llmg_1801	LACR_0807	LLNZ_09275	sortase SrtC
L171000	LLKF_0780	llmg_1800	LACR_0809	LLNZ_09270	hypothetical protein
L0089	LLKF_0802	llmg_1775	LACR_0832	LLNZ_09160	O-acetylserine sulfhydrylase
L193031	LLKF_0803	llmg_1773	LACR_0833	LLNZ_09155	hypothetical protein
L0152	LLKF_0809	llmg_1767	LACR_0839	LLNZ_09125	DeoR family transcriptional regulator
L0104	LLKF_0817	llmg_1758	LACR_0856	LLNZ_09080	N-acetyl-gamma-glutamyl-phosphate reductase
L0105	LLKF_0818	llmg_1757	LACR_0857	LLNZ_09075	bifunctional ornithine acetyltransferase/N-acetylglutamate synthase protein
L0106	LLKF_0819	llmg_1756	LACR_0858	LLNZ_09070	acetylornithine aminotransferase
L0107	LLKF_0820	llmg_1755	LACR_0859	LLNZ_09065	acetylglutamate kinase
L0108	LLKF_0821	llmg_1754	LACR_0860	LLNZ_09060	ornithine carbamoyltransferase
L23500	LLKF_0830	llmg_1745	LACR_0871	LLNZ_09015	hypothetical protein
L30185	LLKF_0835	llmg_1740	LACR_0876	LLNZ_08990	HTH-type transcriptional regulator
L32812	LLKF_0837	llmg_1738	LACR_0878	LLNZ_08975	beta-glucosidase
L35466	LLKF_0839	llmg_1736	LACR_0880	LLNZ_08965	hypothetical protein
L39857	LLKF_0840	llmg_1735	LACR_0885	LLNZ_08960	NADH dehydrogenase
L54803	LLKF_0851	llmg_1720	LACR_0900	LLNZ_08870	uridine phosphorylase
L85895	LLKF_0883	llmg_1683	LACR_0933	LLNZ_08675	hypothetical protein
L92573	LLKF_0889	llmg_1677	LACR_0939	LLNZ_08640	hypothetical protein
L102634	LLKF_0901	llmg_1661	LACR_0955	LLNZ_08550	HU-like DNA-binding protein
L103741	LLKF_0903	llmg_1659	LACR_0959	LLNZ_08540	hypothetical protein
L118271	LLKF_0925	llmg_1641	LACR_0974	LLNZ_08445	acetoin reductase
L124727	LLKF_0930	llmg_1636	LACR_0979	LLNZ_08420	putative permease protein
L131027	LLKF_0936	llmg_1628	LACR_0988	LLNZ_08380	putative secreted protein
L161266	LLKF_0964	llmg_1594	LACR_1008	LLNZ_08200	cell wall-associated hydrolase
L169897	LLKF_0973	llmg_1584	LACR_1017	LLNZ_08155	endonuclease/exonuclease/phosphatase family protein
L172073	LLKF_0975	llmg_1582	LACR_1019	LLNZ_08145	hypothetical protein
L172471	LLKF_0976	llmg_1581	LACR_1020	LLNZ_08140	hypothetical protein
L182020	LLKF_0985	llmg_1571	LACR_1030	LLNZ_08090	aminoacylase/N-acyl-L-amino acid amidohydrolase/hippurate hydrolase
L192192	LLKF_0994	llmg_1553	LACR_1051	LLNZ_07980	putative ABC transporter ATP-binding protein
L13157	LLKF_1014	llmg_1533	LACR_1071	LLNZ_07885	magnesium and cobalt transport protein
L0164	LLKF_1016	llmg_1531	LACR_1073	LLNZ_07875	riboflavin synthase subunit alpha
L0165	LLKF_1017	llmg_1530	LACR_1074	LLNZ_07870	riboflavin biosynthesis protein ribA
L0166	LLKF_1018	llmg_1529	LACR_1075	LLNZ_07865	6,7-dimethyl-8-ribityllumazine synthase
L0129	LLKF_1024	llmg_1520	LACR_1090	LLNZ_07815	two-component system regulator llrE
L0128	LLKF_1026	llmg_1518	LACR_1092	LLNZ_07805	sensor kinase protein
L44260	LLKF_1042	llmg_2124	LACR_1794	LLNZ_10950	hypothetical protein
L200036	LLKF_1047	llmg_0814	LACR_1788	LLNZ_04200	hypothetical protein
L72684	LLKF_1090	llmg_1513	LACR_1157	LLNZ_07780	hypothetical protein
L95481	LLKF_1115	llmg_1485	LACR_1188	LLNZ_07645	hypothetical protein
L100541	LLKF_1121	llmg_1479	LACR_1194	LLNZ_07615	5'-nucleotidase
L129283	LLKF_1143	llmg_1448	LACR_1219	LLNZ_07465	hypothetical protein
L132035	LLKF_1144	llmg_1447	LACR_1220	LLNZ_07460	hypothetical protein
L132621	LLKF_1145	llmg_1446	LACR_1221	LLNZ_07455	hypothetical protein
L142159	LLKF_1154	llmg_1429	LACR_1239	LLNZ_07365	L-lactate dehydrogenase
L151001	LLKF_1162	llmg_1420	LACR_1538	LLNZ_07320	hypothetical protein
L152305	LLKF_1163	llmg_1419	LACR_1248	LLNZ_07315	putative transcriptional regulator
L161455	LLKF_1173	llmg_1344	LACR_1267	LLNZ_06950	hypothetical protein
L0090	LLKF_1185	llmg_1332	LACR_1280	LLNZ_06890	homoserine dehydrogenase
L0091	LLKF_1186	llmg_1331	LACR_1281	LLNZ_06885	homoserine kinase
L200049	LLKF_1243	llmg_1305	LACR_1344	LLNZ_06750	putative transcriptional regulator
L0065	LLKF_1247	llmg_1298	LACR_1336	LLNZ_06710	histidinol-phosphate aminotransferase
L0341	LLKF_1248	llmg_1297	LACR_1335	LLNZ_06705	ATP phosphoribosyltransferase regulatory subunit
L0067	LLKF_1250	llmg_1295	LACR_1332	LLNZ_06690	histidinol dehydrogenase
L0068	LLKF_1252	llmg_1294	LACR_1331	LLNZ_06685	imidazoleglycerol-phosphate dehydratase
L33782	LLKF_1253	llmg_1293	LACR_1330	LLNZ_06680	probable aminoglycoside 3'-phosphotransferase
L0069	LLKF_1254	llmg_1292	LACR_1329	LLNZ_06675	imidazole glycerol phosphate synthase subunit HisH
L0070	LLKF_1255	llmg_1291	LACR_1328	LLNZ_06670	1-(5-phosphoribosyl)-5-(5-phosphoribosylamino)methylideneamino imidazole-4-carboxamide isomerase
L0071	LLKF_1256	llmg_1290	LACR_1327	LLNZ_06665	imidazole glycerol phosphate synthase subunit HisF
L0072	LLKF_1257	llmg_1289	LACR_1326	LLNZ_06660	bifunctional phosphoribosyl-AMP cyclohydrolase/phosphoribosyl-ATP pyrophosphatase protein
L37351	LLKF_1258	llmg_1288	LACR_1325	LLNZ_06655	histidinol-phosphatase
L0075	LLKF_1263	llmg_1284	LACR_1317	LLNZ_06625	isopropylmalate isomerase large subunit
L44550	LLKF_1265	llmg_1281	LACR_1313	LLNZ_06610	putative ABC transporter ATP-binding protein
L0077	LLKF_1266	llmg_1280	LACR_1312	LLNZ_06605	dihydroxy-acid dehydratase
L0078	LLKF_1267	llmg_1279	LACR_1311	LLNZ_06600	acetolactate synthase catalytic subunit
L0079	LLKF_1268	llmg_1278	LACR_1310	LLNZ_06595	acetolactate synthase 3 regulatory subunit
L0080	LLKF_1269	llmg_1277	LACR_1309	LLNZ_06590	ketol-acid reductoisomerase
L52644	LLKF_1272	llmg_1274	LACR_1306	LLNZ_06575	putative regulator AldR
L0099	LLKF_1319	llmg_1226	LACR_1367	LLNZ_06315	5,10-methylenetetrahydrofolate reductase
L0100	LLKF_1320	llmg_1225	LACR_1368	LLNZ_06310	5-methyltetrahydropteroyltriglutamate--homocysteine S-methyltransferase
L0201	LLKF_1328	llmg_1218	LACR_1375	LLNZ_06275	thiamine-phosphate pyrophosphorylase
L0200	LLKF_1329	llmg_1217	LACR_1376	LLNZ_06270	phosphomethylpyrimidine kinase
L94809	LLKF_1330	llmg_1216	LACR_1377	LLNZ_06265	hydroxyethylthiazole kinase
L101896	LLKF_1336	llmg_1205	LACR_1389	LLNZ_06200	hypothetical protein
L102979	LLKF_1338	llmg_1203	LACR_1391	LLNZ_06190	ABC transporter ABC binding and permease protein
L111484	LLKF_1347	llmg_1188	LACR_1402	LLNZ_06115	hypothetical protein
L0121	LLKF_1350	llmg_1185	LACR_1405	LLNZ_06100	diaminopimelate decarboxylase
L114827	LLKF_1351	llmg_1184	LACR_1406	LLNZ_06095	glutamate synthase subunit beta
L0119	LLKF_1352	llmg_1183	LACR_1407	LLNZ_06090	glutamate synthase, large subunit
L120883	LLKF_1353	llmg_1182	LACR_1408	LLNZ_06085	putative acetyltransferase
L125001	LLKF_1357	llmg_1178	LACR_1412	LLNZ_06065	putative glutamate/gamma-aminobutyrate antiporter
L126656	LLKF_1358	llmg_1177	LACR_1413	LLNZ_06060	positive regulator GadR
L130023	LLKF_1361	llmg_1174	LACR_1425	LLNZ_06045	hypothetical protein
L0153	LLKF_1363	llmg_1172	LACR_1427	LLNZ_06035	transcription regulator
L152227	LLKF_1409	llmg_1134	LACR_1442	LLNZ_05855	hypothetical protein
L157055	LLKF_1412	llmg_1131	LACR_1445	LLNZ_05840	2-dehydropantoate 2-reductase
L158193	LLKF_1413	llmg_1130	LACR_1446	LLNZ_05835	hypothetical protein
L181439	LLKF_1435	llmg_1108	LACR_1467	LLNZ_05730	hypothetical protein
L6927	LLKF_1457	llmg_1084	LACR_1503	LLNZ_05610	hypothetical protein
L8702	LLKF_1460	llmg_1083	LACR_1506	LLNZ_05605	hypothetical protein
L200054	LLKF_1462	llmg_1081	LACR_1508	LLNZ_05595	putative secreted protein
L11493	LLKF_1469	llmg_0902	LACR_1707	LLNZ_04635	arsenate reductase
L53979	LLKF_1535	llmg_2006	LACR_2006	LLNZ_10340	hypothetical protein
L200059	LLKF_1542	llmg_1066	LACR_1525	LLNZ_05510	hypothetical protein
L63985	LLKF_1547	llmg_1061	LACR_1530	LLNZ_05485	hypothetical protein
L69000	LLKF_1553	llmg_1055	LACR_1536	LLNZ_05455	transcriptional regulator
L69383	LLKF_1554	llmg_1054	LACR_1537	LLNZ_05450	hypothetical protein
L72115	LLKF_1557	llmg_1050	LACR_1540	LLNZ_05430	hypothetical protein
L0048	LLKF_1566	llmg_1042	LACR_1548	LLNZ_05375	tryptophan synthase subunit alpha
L0049	LLKF_1567	llmg_1041	LACR_1549	LLNZ_05370	tryptophan synthase subunit beta
L95697	LLKF_1568	llmg_1040	LACR_1550	LLNZ_05365	acetyltransferase
L0050	LLKF_1569	llmg_1039	LACR_1551	LLNZ_05360	N-(5'-phosphoribosyl)anthranilate isomerase
L0051	LLKF_1570	llmg_1038	LACR_1552	LLNZ_05355	indole-3-glycerol-phosphate synthase
L0052	LLKF_1571	llmg_1032	LACR_1558	LLNZ_05325	anthranilate phosphoribosyltransferase
L0053	LLKF_1572	llmg_1031	LACR_1559	LLNZ_05320	anthranilate synthase component II
L0054	LLKF_1573	llmg_1030	LACR_1560	LLNZ_05315	anthranilate synthase component I
L104065	LLKF_1578	llmg_1025	LACR_1566	LLNZ_05290	hypothetical protein
L104745	LLKF_1579	llmg_1024	LACR_1567	LLNZ_05285	hypothetical protein
L105533	LLKF_1580	llmg_1023	LACR_1568	LLNZ_05280	ferric uptake regulation protein
L106608	LLKF_1581	llmg_1021	LACR_1569	LLNZ_05265	hypothetical protein
L108008	LLKF_1583	llmg_1019	LACR_1571	LLNZ_05255	oxidoreductase, short-chain dehydrogenase/reductase family protein
L110960	LLKF_1590	llmg_1017	LACR_1573	LLNZ_05240	MarR family transcriptional regulator
L112499	LLKF_1592	llmg_1015	LACR_1575	LLNZ_05230	hypothetical protein
L117718	LLKF_1601	llmg_1006	LACR_1584	LLNZ_05190	fructokinase
L128777	LLKF_1609	llmg_1010	LACR_0762	LLNZ_05205	binding-protein-dependent transport systems inner membrane component
L129753	LLKF_1610	llmg_1009	LACR_0761	LLNZ_05200	sugar ABC transporter substrate binding protein
L0234	LLKF_1625	llmg_1320	LACR_1291	LLNZ_06820	beta-xylosidase
L0230	LLKF_1629	llmg_1002	LACR_1596	LLNZ_05170	XylA protein
L0229	LLKF_1630	llmg_1001	LACR_1597	LLNZ_05165	xylose operon regulator
L154512	LLKF_1634	llmg_0996	LACR_1602	LLNZ_05140	TetR family transcriptional regulator
L160442	LLKF_1638	llmg_0993	LACR_1606	LLNZ_05115	hypoxanthine phosphoribosyltransferase
L162229	LLKF_1640	llmg_0991	LACR_1608	LLNZ_05105	AcrR family transcriptional regulator
L162870	LLKF_1641	llmg_0989	LACR_1609	LLNZ_05090	ABC transporter ATP binding and permease protein
L178621	LLKF_1656	llmg_0971	LACR_1624	LLNZ_04990	hypothetical protein
L178933	LLKF_1657	llmg_0970	LACR_1625	LLNZ_04985	carboxymuconolactone decarboxylase family protein
L179277	LLKF_1658	llmg_0969	LACR_1626	LLNZ_04980	hypothetical protein
L179660	LLKF_1659	llmg_0968	LACR_1627	LLNZ_04975	oxidoreductase
L180636	LLKF_1660	llmg_0967	LACR_1628	LLNZ_04970	putative permease protein
L182006	LLKF_1661	llmg_0966	LACR_1629	LLNZ_04965	MarR family transcriptional regulator
L194226	LLKF_1676	llmg_0950	LACR_1646	LLNZ_04880	putative oxidoreductase
L198485	LLKF_1680	llmg_0945	LACR_1650	LLNZ_04860	putative glycerol dehydrogenase
L3279	LLKF_1684	llmg_0941	LACR_1654	LLNZ_04840	acetyltransferase
L0094	LLKF_1685	llmg_0940	LACR_1655	LLNZ_04835	dihydrodipicolinate reductase
L18033	LLKF_1728	llmg_0924	LACR_1682	LLNZ_04755	hypothetical protein
L24314	LLKF_1730	llmg_0922	LACR_1687	LLNZ_04740	putative secreted protein
L25107	LLKF_1731	llmg_0921	LACR_1688	LLNZ_04735	putative secreted protein
L25903	LLKF_1732	llmg_0920	LACR_1689	LLNZ_04730	putative secreted protein
L27628	LLKF_1734	llmg_0918	LACR_1691	LLNZ_04715	hypothetical protein
L0235	LLKF_1741	llmg_0911	LACR_1698	LLNZ_04680	nitrogen regulatory protein P-II
L0236	LLKF_1742	llmg_0910	LACR_1699	LLNZ_04675	ammonium transporter
L48287	LLKF_1757	llmg_0889	LACR_1713	LLNZ_04575	hypothetical protein
L0249	LLKF_1758	llmg_0888	LACR_1714	LLNZ_04570	ArsR family transcriptional regulator
L49325	LLKF_1759	llmg_0887	LACR_1715	LLNZ_04565	cation transport protein
L52568	LLKF_1762	llmg_0884	LACR_1718	LLNZ_04550	hypothetical protein
L54040	LLKF_1763	llmg_0883	LACR_1719	LLNZ_04545	hypothetical protein
L54406	LLKF_1764	llmg_0882	LACR_1720	LLNZ_04540	hypothetical protein
L54719	LLKF_1765	llmg_0881	LACR_1721	LLNZ_04535	branched chain amino acid ABC transporter
L55584	LLKF_1766	llmg_0880	LACR_1722	LLNZ_04530	putative oxidoreductase
L58460	LLKF_1769	llmg_0877	LACR_1726	LLNZ_04515	putative secreted protein
L0093	LLKF_1772	llmg_0874	LACR_1729	LLNZ_04500	dihydrodipicolinate synthase
L65733	LLKF_1774	llmg_0873	LACR_1730	LLNZ_04490	putative (di)nucleoside polyphosphate hydrolase
L66199	LLKF_1775	llmg_0871	LACR_1731	LLNZ_04480	aspartate-semialdehyde dehydrogenase
L67370	LLKF_1776	llmg_0870	LACR_1732	LLNZ_04475	transporter
L0019	LLKF_1785	llmg_0862	LACR_1742	LLNZ_04430	glucuronate isomerase
L74167	LLKF_1786	llmg_0861	LACR_1743	LLNZ_04425	hypothetical protein
L0023	LLKF_1787	llmg_0860	LACR_1744	LLNZ_04420	Na-galactoside symporter
L0020	LLKF_1788	llmg_0859	LACR_1745	LLNZ_04415	mannonate dehydratase
L0241	LLKF_1789	llmg_0858	LACR_1746	LLNZ_04410	fructuronate reductase
L0240	LLKF_1790	llmg_0857	LACR_1747	LLNZ_04405	GntR family transcription regulator
L80679	LLKF_1791	llmg_0856	LACR_1748	LLNZ_04400	hypothetical protein
L82310	LLKF_1792	llmg_0789	LACR_1798	LLNZ_04090	ribose ABC transporter substrate binding protein RbsB
L84240	LLKF_1794	llmg_0787	LACR_1800	LLNZ_04080	ribose import ATP-binding protein rbsA
L103502	LLKF_1812	llmg_0767	LACR_1820	LLNZ_03990	hypothetical protein
L115107	LLKF_1823	llmg_0757	LACR_1831	LLNZ_03940	hypothetical protein
L116299	LLKF_1825	llmg_0755	LACR_1833	LLNZ_03930	hypothetical protein
L128692	LLKF_1838	llmg_0743	LACR_1849	LLNZ_03870	alpha-amylase
L148945	LLKF_1872	llmg_0725	LACR_1868	LLNZ_03775	hypothetical protein
L149781	LLKF_1873	llmg_0724	LACR_1869	LLNZ_03770	hypothetical protein
L152977	LLKF_1885	llmg_1894	LACR_1875	LLNZ_09755	phosphoglycerate mutase family protein
L161059	LLKF_1894	llmg_1905	LACR_1886	LLNZ_09810	putative esterase
L0055	LLKF_1913	llmg_1924	LACR_1905	LLNZ_09905	prephenate dehydratase
L0058	LLKF_1916	llmg_1927	LACR_1908	LLNZ_09920	prephenate dehydrogenase
L19745	LLKF_1949	llmg_1959	LACR_1948	LLNZ_10100	phosphinothricin N-acetyltransferase
L0228	LLKF_1951	llmg_1961	LACR_1950	LLNZ_10110	transcriptional activator TenA
L200067	LLKF_1952	llmg_1962	LACR_1951	LLNZ_10115	hypothetical protein
L0191	LLKF_1953	llmg_1963	LACR_1952	LLNZ_10120	biotin--acetyl-CoA-carboxylase ligase and biotin operon repressor
L24031	LLKF_1954	llmg_1964	LACR_1953	LLNZ_10125	hypothetical protein
L24742	LLKF_1955	llmg_1965	LACR_1955	LLNZ_10130	putative AMP-binding enzyme
L37916	LLKF_1969	llmg_1978	LACR_1977	LLNZ_10215	polar amino acid transport system ATP-binding protein
L38650	LLKF_1970	llmg_1979	LACR_1978	LLNZ_10220	glutamate ABC transporter permease protein
L0244	LLKF_1974	llmg_1983	LACR_1982	LLNZ_10240	CodY family transcriptional regulator
L48903	LLKF_1975	llmg_1984	LACR_1983	LLNZ_10245	transcriptional regulator
L55758	LLKF_1981	llmg_1991	LACR_1990	LLNZ_10275	alcohol dehydrogenase
L71879	LLKF_2012	llmg_2009	LACR_2010	LLNZ_10355	hypothetical protein
L77220	LLKF_2019	llmg_2015	LACR_2016	LLNZ_10385	hypothetical protein
L88446	LLKF_2029	llmg_0701	LACR_2026	LLNZ_03645	oligopeptide-binding protein oppA precursor
L90358	LLKF_2030	llmg_0700	LACR_2027	LLNZ_03640	oligopeptide ABC transporter, permease protein
L91252	LLKF_2031	llmg_0699	LACR_2028	LLNZ_03635	peptide transport system permease protein oppB
L92192	LLKF_2032	llmg_0698	LACR_2029	LLNZ_03630	oligopeptide transport ATP-binding protein oppF
L93148	LLKF_2033	llmg_0697	LACR_2030	LLNZ_03625	oligopeptide transport ATP-binding protein oppD
L102972	LLKF_2045	llmg_2041	LACR_2044	LLNZ_10515	hypothetical protein
L104285	LLKF_2047	llmg_2043	LACR_2046	LLNZ_10525	hypothetical protein
L110467	LLKF_2051	llmg_2047	LACR_2050	LLNZ_10545	universal stress protein E
L126956	LLKF_2067	llmg_2065	LACR_2068	LLNZ_10630	aldo/keto reductase family oxidoreductase
L127813	LLKF_2068	llmg_2066	LACR_2069	LLNZ_10635	multidrug resistance protein B
L0246	LLKF_2070	llmg_2068	LACR_2072	LLNZ_10645	MerR family transcriptional regulator
L132126	LLKF_2072	llmg_2070	LACR_2074	LLNZ_10655	hypothetical protein
L142733	LLKF_2082	llmg_2143	LACR_2146	LLNZ_11055	putative 20-kDa protein
L143459	LLKF_2084	llmg_2145	LACR_2148	LLNZ_11065	hypothetical protein
L145850	LLKF_2088	llmg_2149	LACR_2153	LLNZ_11085	putative Nudix hydrolase
L146384	LLKF_2089	llmg_2150	LACR_2154	LLNZ_11090	hypothetical protein
L152419	LLKF_2094	llmg_2157	LACR_2160	LLNZ_11125	putative 6-phosphogluconolactonase
L169795	LLKF_2103	llmg_2168	LACR_2180	LLNZ_11195	hypothetical protein
L181238	LLKF_2113	llmg_2183	LACR_2190	LLNZ_11270	hypothetical protein
L181807	LLKF_2114	llmg_2184	LACR_2191	LLNZ_11275	hypothetical protein
L187329	LLKF_2119	llmg_2191	LACR_2196	LLNZ_11310	hypothetical protein
L6094	LLKF_2005	llmg_2261	LACR_0304	LLNZ_11665	phage protein by Glimmer/Critica
L13744	LLKF_2130	llmg_2203	LACR_2208	LLNZ_11370	cadmium resistance protein
L200076	LLKF_2131	llmg_0060	LACR_0037	LLNZ_00300	hypothetical protein
L14951	LLKF_2132	llmg_0059	LACR_0035	LLNZ_00290	hypothetical protein
L16252	LLKF_2134	llmg_2325	LACR_2339	LLNZ_12010	hypothetical protein
L17182	LLKF_2136	llmg_2324	LACR_2338	LLNZ_12005	hypothetical protein
L21717	LLKF_2142	llmg_2213	LACR_2224	LLNZ_11415	hypothetical protein
L25433	LLKF_2145	llmg_2216	LACR_2227	LLNZ_11430	cell-cycle regulation histidine triad protein
L35675	LLKF_2160	llmg_2230	LACR_2239	LLNZ_11495	gamma-carboxymuconolactone decarboxylase
L35965	LLKF_2161	llmg_2231	LACR_2240	LLNZ_11500	MerR family transcriptional regulator
L36511	LLKF_2162	llmg_2232	LACR_2241	LLNZ_11505	hypothetical protein
L51032	LLKF_2173	llmg_2242	LACR_2250	LLNZ_11560	hypothetical protein
L69304	LLKF_2194	llmg_2283	LACR_2290	LLNZ_11805	hypothetical protein
L71425	LLKF_2197	llmg_2286	LACR_2293	LLNZ_11820	hypothetical protein
L78133	LLKF_2203	llmg_2294	LACR_2304	LLNZ_11865	hypothetical protein
L78607	LLKF_2204	llmg_2295	LACR_2305	LLNZ_11870	hypothetical protein
L82956	LLKF_2209	llmg_2297	LACR_2307	LLNZ_11875	hypothetical protein
L0111	LLKF_2217	llmg_2307	LACR_2316	LLNZ_11915	arginine/ornithine antiporter
L93826	LLKF_2220	llmg_2310	LACR_2319	LLNZ_11930	carbamate kinase
L125244	LLKF_2300	llmg_2333	LACR_2347	LLNZ_12060	hypothetical protein
L127921	LLKF_2304	llmg_2338	LACR_2355	LLNZ_12085	hypothetical protein
L131806	LLKF_2308	llmg_2342	LACR_2359	LLNZ_12105	hypothetical protein
L134080	LLKF_2310	llmg_0692	LACR_1043	LLNZ_03600	hypothetical protein
L134606	LLKF_2313	llmg_2346	LACR_2365	LLNZ_12130	GmhA protein
L146261	LLKF_2334	llmg_2368	LACR_2388	LLNZ_12235	hypothetical protein
L0092	LLKF_2352	llmg_2387	LACR_2405	LLNZ_12330	threonine synthase
L164222	LLKF_2360	llmg_2395	LACR_2413	LLNZ_12370	hypothetical protein
L168783	LLKF_2366	llmg_2402	LACR_2421	LLNZ_12415	hypothetical protein
L177685	LLKF_2375	llmg_2410	LACR_2430	LLNZ_12455	hypothetical protein
L192043	LLKF_2388	llmg_2423	LACR_2443	LLNZ_12525	hypothetical protein
L16221	LLKF_2399	llmg_2434	LACR_2459	LLNZ_12580	hypothetical protein
L16705	LLKF_2400	llmg_2435	LACR_2460	LLNZ_12585	hypothetical protein
L26428	LLKF_2413	llmg_2447	LACR_2469	LLNZ_12655	hypothetical protein
L29875	LLKF_2416	llmg_2452	LACR_2475	LLNZ_12680	hypothetical protein
L30878	LLKF_2417	llmg_2453	LACR_2476	LLNZ_12685	putative transcriptional regulator
L31269	LLKF_2418	llmg_2454	LACR_2478	LLNZ_12690	hypothetical protein
L59950	LLKF_2438	llmg_2477	LACR_2505	LLNZ_12800	lysine specific permease
L65440	LLKF_2469	llmg_2483	LACR_2511	LLNZ_12830	hypothetical protein
L82539	LLKF_2485	llmg_2495	LACR_2522	LLNZ_12890	hypothetical protein
L92665	LLKF_2493	llmg_2504	LACR_2531	LLNZ_12935	aspartate racemase
L93420	LLKF_2494	llmg_2505	LACR_2532	LLNZ_12940	hypothetical protein
L0095	LLKF_2495	llmg_2506	LACR_2533	LLNZ_12945	asparagine synthase
L103195	LLKF_2503	llmg_2514	LACR_2541	LLNZ_12985	hypothetical protein
L112616	LLKF_2511	llmg_2522	LACR_2552	LLNZ_13020	hypothetical protein
L120589	LLKF_2517	llmg_2542	LACR_2558	LLNZ_13130	transcriptional regulator
L121175	LLKF_2518	llmg_2543	LACR_2559	LLNZ_13135	hypothetical protein
L123249	LLKF_2519	llmg_2544	LACR_2562	LLNZ_13140	hypothetical protein
L130944	LLKF_2522	llmg_2547	LACR_2585	LLNZ_13160	hypothetical protein
L132038	LLKF_2523	llmg_2548	LACR_2586	LLNZ_13165	hypothetical protein
