# Supplementary material for: Complete Genome Sequence and Comparative Analysis of the Fish Pathogen Lactococcus garvieae
Source: PLoS One. 2011 Aug 4;6(8):e23184. doi: 10.1371/journal.pone.0023184 (PMC3150408; doi:10.1371/journal.pone.0023184)
Supplement: Table S4 — Primer sequences used for RT-PCR. (XLSX) [file pone.0023184.s007.xlsx]

## Sheet: Table S4
Table S4. Primer sequences used for RT-PCR
Gene product	Primer	Sequence	Product size (bp)
ATF	Forward	GTGAAAACACTTGGATTCGGTG	482
	Reverse	GCAGCTATAACACAATGGTTCC
conserved hypotherical protein	Forward	CTGCTGATCAAGTCCAAGC	303
	Reverse	GAGAAACGACCTTAGCTCCA
EpsA	Forward	TTATAGCCTCCCCAGTTTACAC	299
	Reverse	TTTAGCAGTCTCGTCTGCAATC
EpsB	Forward	CGCAAGTGCTAATCTAGCTG	317
	Reverse	AGAGAGGCGGAGTATCAATC
EpsC	Forward	TAACAACTATCACTGCGACTCC	343
	Reverse	TCAGGGTTCTCAATGATTCCAC
EpsD	Forward	TTTCTTATTGCGGCTGCATTGC	270
	Reverse	CTCATCAATTGAGTGTCGTCTG
EpsL	Forward	ACCAATCGTACAGATCAACG	473
	Reverse	CTTGAGCCACCACTATCAAG
EpsR	Forward	TTTTACCACCGGCTAAAGGAAC	211
	Reverse	TTGCAGAACTGTCATTAGGCTC
EpsX	Forward	TATTGAAGCAACAGCCTCACTG	198
	Reverse	TTTTTGTCTGGGTAACTAGCCC
FPase	Forward	ACTAACCCCGAAAGAATATGGC	298
	Reverse	GATAGCTTGGGGCACTATATTC
GTase1	Forward	CCTTACCCTTAGCAGTATTTGG	227
	Reverse	AAATGTTGGATTCGGAGATAGCCC
GTase2	Forward	TTCCGGTAATTCTATACACCGG	210
	Reverse	CAGAAAATCGATCCACATCCTG
oligosaccharide repeat unit polymerase	Forward	AGATCTCGGGCAATAGGAC	343
	Reverse	TGCTGGACTAAGAGACTCACA
rhamnosyltransferase	Forward	TTGATGGTAAATCCTGATGG	307
	Reverse	GAACAAACCGACCTACAACA
UDP	Forward	GCTACAACGAATAAAGCGCTAG	595
	Reverse	GCTGTTTGGTATCTTTCGGTA
30S rRNA gene	Forward	TACGAACACCGTATCCTTGAC	207
	Reverse	TTGTGTTGGTTCGATGATGTCG
