# Supplementary material for: Complete Genome Sequence and Comparative Analysis of the Fish Pathogen Lactococcus garvieae
Source: PLoS One. 2011 Aug 4;6(8):e23184. doi: 10.1371/journal.pone.0023184 (PMC3150408; doi:10.1371/journal.pone.0023184)
Supplement: Table S5 — Properities and similarities of the capsule gene clusters in the human gut microbiome (Subjects 2 and 17). (XLSX) [file pone.0023184.s008.xlsx]

## Sheet: Table S5
Table S5. Properities and similarities of the capsule gene clusters in the human gut microbiome (Subjects 2 and 17)
Sample	Size (nt)	Predicted gene product	Ortholog in Lg2	Best BLASTP hit	Amino acid identity (%)	Accession No.
Subject 2	411	truncated transposase	-	L. lactis SK11	97	ADQ62464
	903	conserved hypothetical protein CpsW	LGlg2_446	S thermophilus	100	AAM93404
	903	conserved hypothetical protein EpsL	LGlg2_445	L. lactis SMQ-461	96	AAX19712
	225	truncated transposase	-	L. lactis SK11	100	ABJ72454
	276	truncated transposase	-	L. lactis SK11	98	ABJ72246
	1080	oligosaccharide repeat unit polymerase EpsP	-	S thermophilus	98	ADQ63063
	708	glycosyltransferase Eps7I	-	S thermophilus	100	ADQ63064
	507	glycosyltransferase Eps7J	-	S thermophilus	100	AAN63740
	450	glycosyltransferase EpsE	-	S thermophilus	100	ADQ63066
	687	sugar transferase EpsD	LGlg2_437	L. lactis SMQ-461	88	AAX19703
	765	phosphatase EpsC	LGlg2_436	L. lactis KF147	98	ABX75681
	696	kinase EpsB	LGlg2_435	L. lactis Ropy352	93	ABN47386
	780	chain length regulator EpsA	LGlg2_434	L. lactis SMQ-461	99	AAX19700
	768	conserved hypothetical protein EpsX	LGlg2_433	L. lactis HO2	100	AAP32714
	318	transcriptional regulator EpsR	LGlg2_432	L. lactis NIZO B40	100	AAC45226
Subject 17	411	truncated transposase	-	L. lactis SK11	97	ABJ72246
	903	conserved hypothetical protein CpsW	LGlg2_446	S thermophilus	100	AAM93404
	912	conserved hypothetical protein EpsL	LGlg2_445	L. lactis SMQ-461	95	AAX19712
	591	transposase	-	L. lactis SK11	99	ABJ73012
	1095	oligosaccharide repeat unit polymerase EpsP	-	L. lactis Ropy352	98	ABN47392
	708	glycosyltransferase Eps7I	-	L. lactis Ropy352	100	ABN47391
	507	glycosyltransferase Eps7J	-	L. lactis Ropy352	99	ABN47390
	450	glycosyltransferase EpsE	-	L. lactis Ropy352	100	ABN47389
	687	sugar transferase EpsD	LGlg2_437	L. lactis SMQ-461	94	AAX19703
	765	phosphatase EpsC	LGlg2_436	L. lactis KF147	98	ABX75681
	696	kinase EpsB	LGlg2_435	L. lactis KF147	96	ABX75680
	780	chain length regulator EpsA	LGlg2_434	L. lactis SMQ-461	99	AAX19700
